# Supplementary material for: A Universal Isotherm Model to Capture Adsorption Uptake and Energy Distribution of Porous Heterogeneous Surface
Source: PubMed Central journal article supplement (PMC5587542; doi:10.1038/s41598-017-11156-6), 2017-09-06
Supplement: 41598_2017_11156_MOESM1_ESM.pdf [file 41598_2017_11156_MOESM1_ESM.pdf]

# A Universal Isotherm Model to Capture Adsorption Uptake and Energy Distribution of Porous Heterogeneous Surface

<sup>1</sup>Kim Choon Ng, <sup>2</sup>Muhammad Burhan, <sup>3</sup>Muhammad Wakil Shahzad, <sup>4</sup>Azahar Bin Ismail

<sup>1-4</sup>King Abdullah University of Science and Technology, Thuwal 23955-6900, Saudi Arabia.

Emails: [kimchoon.ng@kaust.edu.sa](mailto:kimchoon.ng@kaust.edu.sa), [muhammad.burhan@kaust.edu.sa](mailto:muhammad.burhan@kaust.edu.sa),  
[muhammad.shahzad@kaust.edu.sa](mailto:muhammad.shahzad@kaust.edu.sa)

## Supplementary Information:

The parameters related to universal adsorption model for presented isotherm predictions are given in the tables below:

Table 1: Key values of parameters of universal adsorption model for Type-I isotherm

| Parameter               | Value  | Parameter               | Value  |
|-------------------------|--------|-------------------------|--------|
| $\epsilon_{o1}$ (J/mol) | 5799.9 | $\epsilon_{o2}$ (J/mol) | 1729.6 |
| m1 (J/mol)              | 1529.9 | m2 (J/mol)              | 635.2  |
| $\alpha_1$              | 0.307  | $\alpha_2$              | 0.693  |
| $P_s$ (kPa)             | 3.169  | $q^*$ (kg/kg)           | 0.45   |

Table 2: Key values of parameters of universal adsorption model for Type-II isotherm

| Parameter               | Value  | Parameter               | Value  |
|-------------------------|--------|-------------------------|--------|
| $\epsilon_{o1}$ (J/mol) | 866.8  | $\epsilon_{o2}$ (J/mol) | 9078.4 |
| m1 (J/mol)              | 490.4  | m2 (J/mol)              | 3212.5 |
| $\alpha_1$              | 0.4265 | $\alpha_2$              | 0.5735 |
| $P_s$ (kPa)             | 2.645  | $q^*$ (kg/kg)           | 0.42   |

Table 3: Key values of parameters of universal adsorption model for Type-III isotherm

| Parameter               | Value  | Parameter               | Value   |
|-------------------------|--------|-------------------------|---------|
| $\epsilon_{o1}$ (J/mol) | 477.75 | $\epsilon_{o2}$ (J/mol) | 1453.13 |
| m1 (J/mol)              | 97.64  | m2 (J/mol)              | 591.17  |
| $\alpha_1$              | 0.5789 | $\alpha_2$              | 0.4211  |
| $P_s$ (kPa)             | 4.247  | $q^*$ (kg/kg)           | 0.8     |

Table 4: Key values of parameters of universal adsorption model for Type-IV isotherm

| Parameter               | Value   | Parameter               | Value   |
|-------------------------|---------|-------------------------|---------|
| $\epsilon_{o1}$ (J/mol) | 2096.47 | $\epsilon_{o2}$ (J/mol) | 5613.18 |
| m1 (J/mol)              | 478.42  | m2 (J/mol)              | 4025.90 |
| $\alpha_1$              | 0.6755  | $\alpha_2$              | 0.3245  |
| $P_s$ (kPa)             | 5.629   | $q^*$ (kg/kg)           | 0.36    |

Table 5: Key values of parameters of universal adsorption model for Type-V isotherm

| Parameter               | Value   | Parameter               | Value   |
|-------------------------|---------|-------------------------|---------|
| $\epsilon_{o1}$ (J/mol) | 2309.31 | $\epsilon_{o2}$ (J/mol) | 4112.51 |
| m1 (J/mol)              | 1352.90 | m2 (J/mol)              | 121.31  |
| $\alpha_1$              | 0.3531  | $\alpha_2$              | 0.6469  |
| $P_s$ (kPa)             | 3.1699  | $q^*$ (kg/kg)           | 0.23    |

Table 6: Key values of parameters of universal adsorption model for Type-VI isotherm

| Parameter               | Value   | Parameter               | Value  |
|-------------------------|---------|-------------------------|--------|
| $\epsilon_{o1}$ (J/mol) | 3133.83 | $\epsilon_{o3}$ (J/mol) | 235.07 |
| m1 (J/mol)              | 342.77  | m3 (J/mol)              | 32.32  |
| $\alpha_1$              | 0.2349  | $\alpha_3$              | 0.1978 |
| $\epsilon_{o2}$ (J/mol) | 640.15  | $\epsilon_{o4}$ (J/mol) | 45     |
| m2 (J/mol)              | 39.58   | m4 (J/mol)              | 29.37  |
| $\alpha_2$              | 0.2141  | $\alpha_4$              | 0.3532 |
| $P_s$ (kPa)             | 3.17    | $q^*$ (kg/kg)           | 0.23   |
